# Supplementary material
Source: PubMed Central journal article supplement (PMC5986728)
Supplement: mmc1.pdf [file mmc1.pdf]

The American Journal of Human Genetics, Volume 102

## Supplemental Data

### **An Osteoporosis Risk SNP at 1p36.12 Acts as an Allele-Specific Enhancer to Modulate *LINC00339* Expression via Long-Range Loop Formation**

**Xiao-Feng Chen, Dong-Li Zhu, Man Yang, Wei-Xin Hu, Yuan-Yuan Duan, Bing-Jie Lu, Yu Rong, Shan-Shan Dong, Ruo-Han Hao, Jia-Bin Chen, Yi-Xiao Chen, Shi Yao, Hlaing Nwe Thynn, Yan Guo, and Tie-Lin Yang**

## Supplemental Figures and Legends

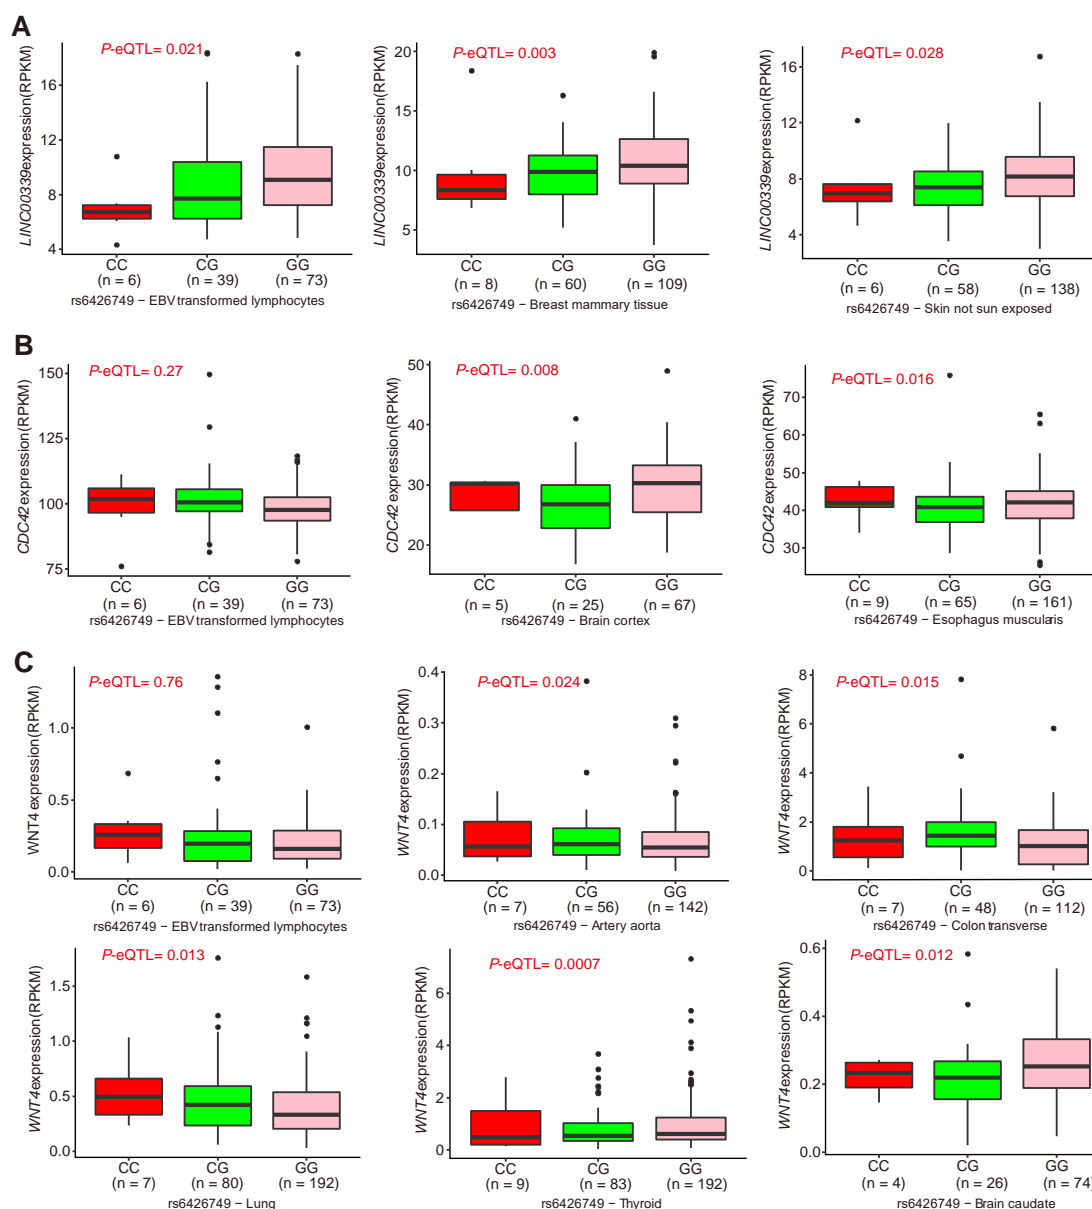

**Figure S1. eQTL analyses for rs6426749 with *LINC00339*, *CDC42* and *WNT4* from GTEx**

We checked the eQTL association from the Genotype-Tissue Expression (GTEx) database,<sup>1</sup> including 7,051 samples from 449 donors across 44 tissues. The eQTL analysis from GTEx Project<sup>1</sup> between rs6426749 and *LINC00339* (A), *CDC42* (B) or *WNT4* (C) on LCLs and other significant tissues ( $P < 0.05$ ) are shown.

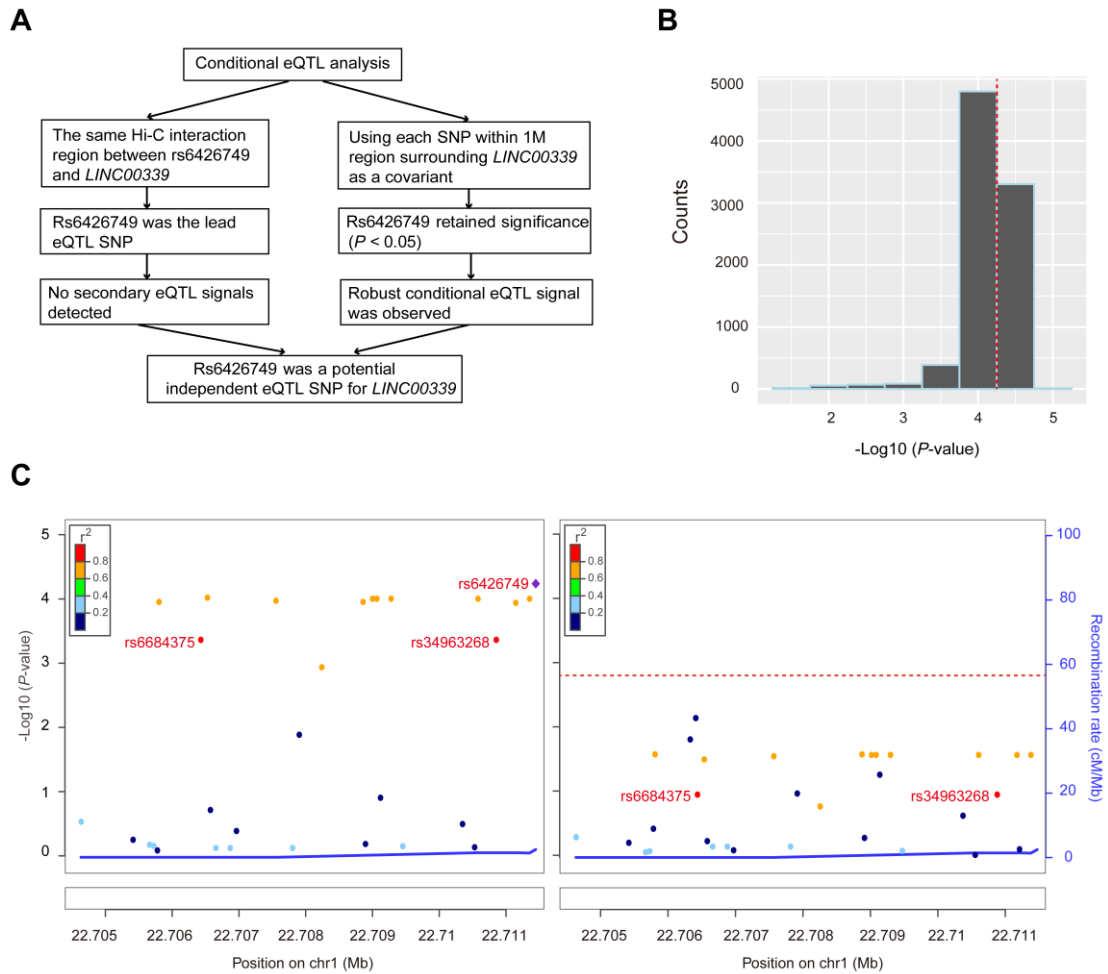

**Figure S2. Conditional eQTL analysis for rs6426749**

(A) Flowchart of conditional eQTL analysis. (B) Distribution of conditional eQTL signals for rs6426749 on *LINC00339* using each SNP within 1M region surrounding *LINC00339* as a covariate. Raw eQTL signal for rs6426749 with *LINC00339* was marked with dashed red line. (C) Raw (left) and conditional (right) eQTL signal (using rs6426749 as a covariate) for all SNPs within the same Hi-C interaction region with rs6426749. The dashed line represents significant association level of secondary eQTL SNPs (Bonferroni adjusted  $P$ -value  $< 0.05$ ). Conditional eQTL analysis was performed by fitting the selected cis-eQTL SNP genotype as a covariate and testing for the secondary association retained using ANNOVA. Bonferroni correction was applied to determine the significance of secondary eQTLs.

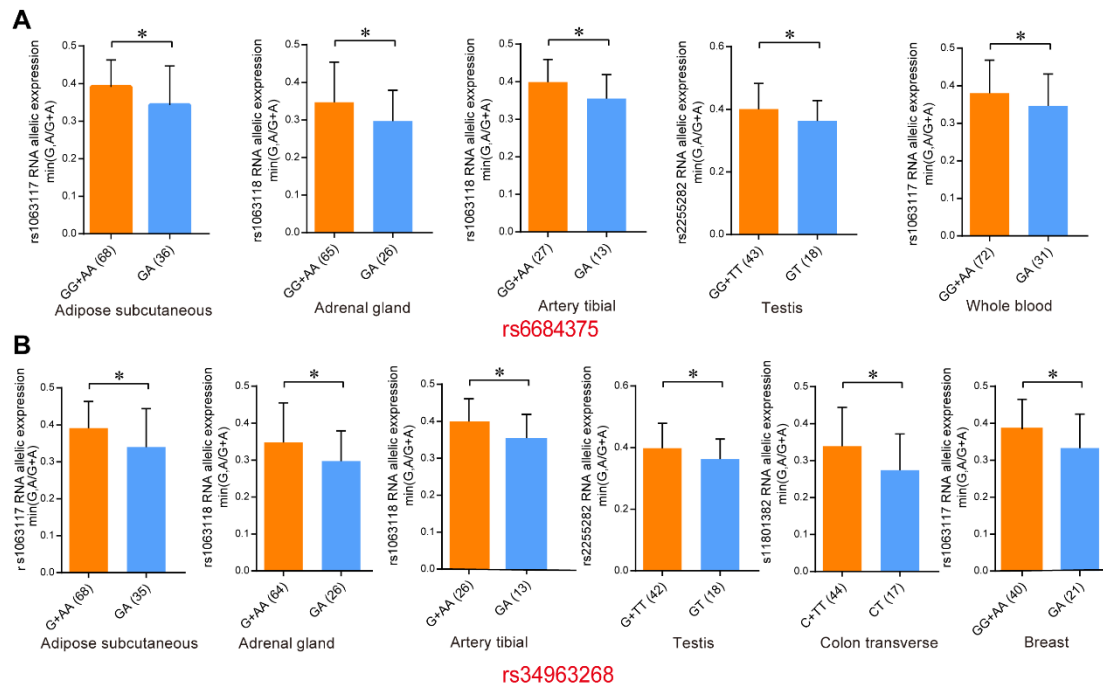

**Figure S3. Allele specific expression analysis result on *LINC00339* for rs6684375 and rs34963268**

Allele specific expression (ASE) analysis between rs6684375 (A) or rs34963268 (B) and *LINC00339*, using monoallelic gene expression data from GTEx<sup>1</sup>. Only significant tissues ( $P < 0.05$ ) are shown. Error bars, s.d. \* $P < 0.05$  as determined by Wilcoxon rank sum test.

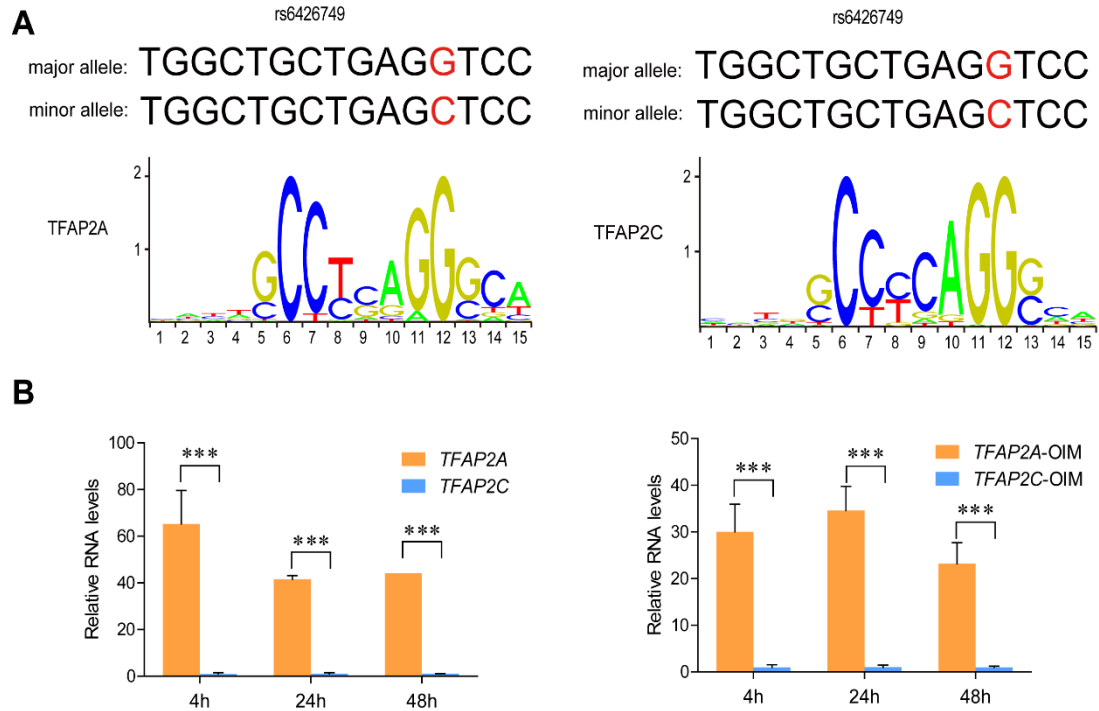

**Figure S4. *TFAP2A* is predominantly higher expressed than *TFAP2C* in hFOB1.19 cells**

(A) Motif predictions for rs6426749. Two TFAP family motifs (*TFAP2A*, *TFAP2C*) were predicted to exclusively bind to major allele (G) of rs6426749. (B) Comparison of mRNA expressions for *TFAP2A* and *TFAP2C* in hFOB1.19 cells undergoing spontaneous differentiation or with the effect of Osteogenic Induction Media (OIM). RNA expression data was extracted from GEO database (GEO: GSE75232).<sup>2</sup> Relative mRNA expression levels were normalized by equalizing *TFAP2C* expression levels to 1. Error bars, s.d. \*\*\* $P < 0.001$  as determined by an unpaired, two-tailed Student's t-test.

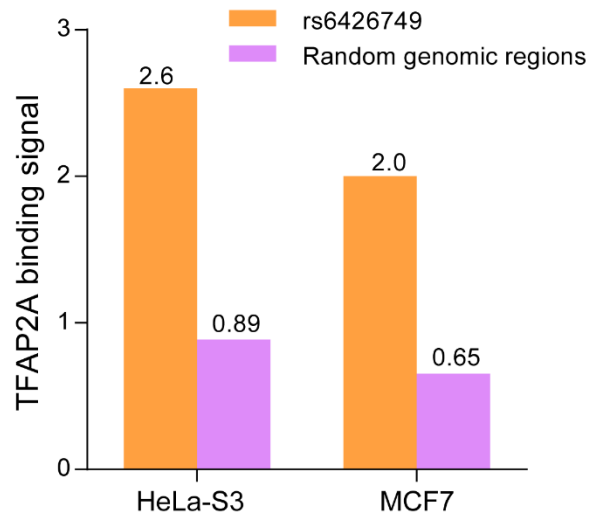

**Figure S5. Comparison of TFAP2A binding on rs6426749-locus and random genomic regions**

We compared the average TF binding signal surrounding rs6426749 (50-bp) with 1,000,000 randomly chosen genomic regions from 22 autosomes of the same length. Average TFAP2A binding signals for rs6426749-locus and 1,000,000 random genomic regions in HeLa-S3 cells and MCF7 cells were shown, respectively.

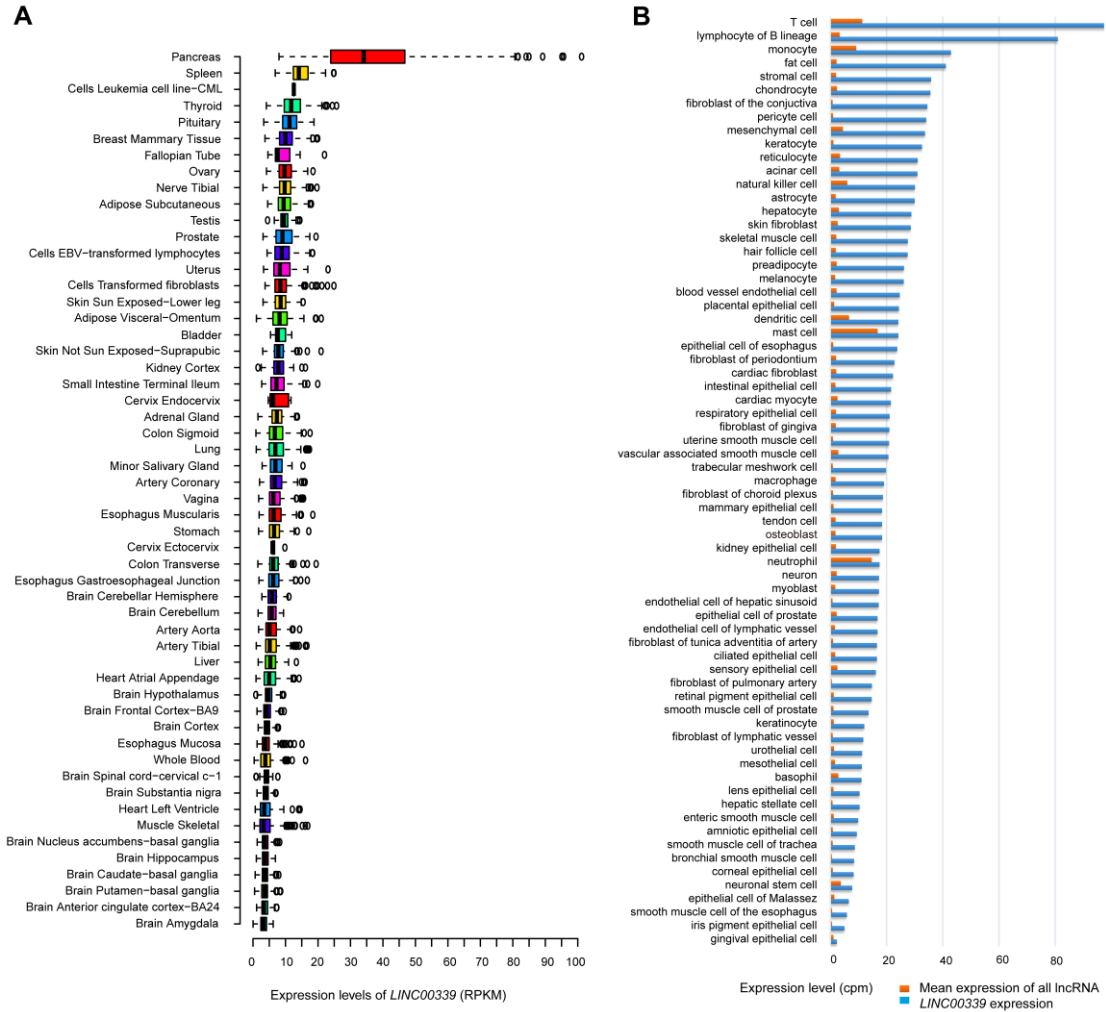

**Figure S6. *LINC00339* is extensively expressed in both tissue and cell levels**

*LINC00339* expression levels were analyzed in 54 diverse tissues from GTEx Project<sup>1</sup> (A) and 69 diverse primary cells from FANMOT5<sup>3</sup> (B), respectively. cpm, counts per million.

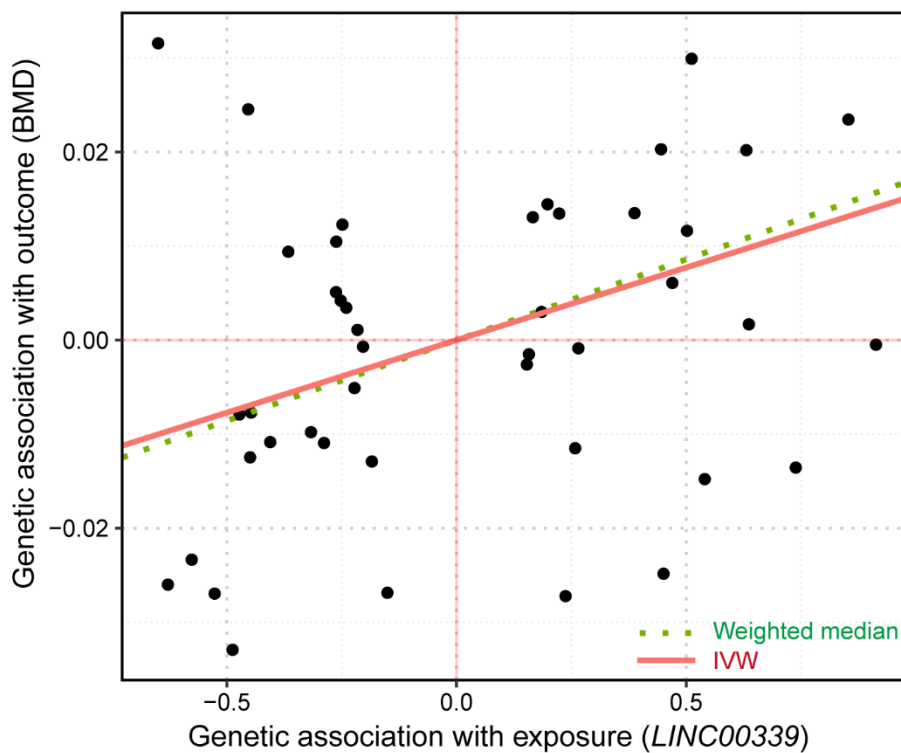

**Figure S7. Scatter plot of genetic association with *LINC00339* against association with BMD**

Each dot indicated one of 44 total genetic variants used as instrumental variables for multi-instrument based Median randomization analysis. The x and y axis represented coefficients of genetic association with *LINC00339* (eQTL) from GTEx whole blood tissue<sup>1</sup> or genetic association with BMD from UK Biobank,<sup>4</sup> respectively. The red line and green dashed line corresponded to slope from IVW or weighted median, respectively. IVW, inverse-variance weighted.



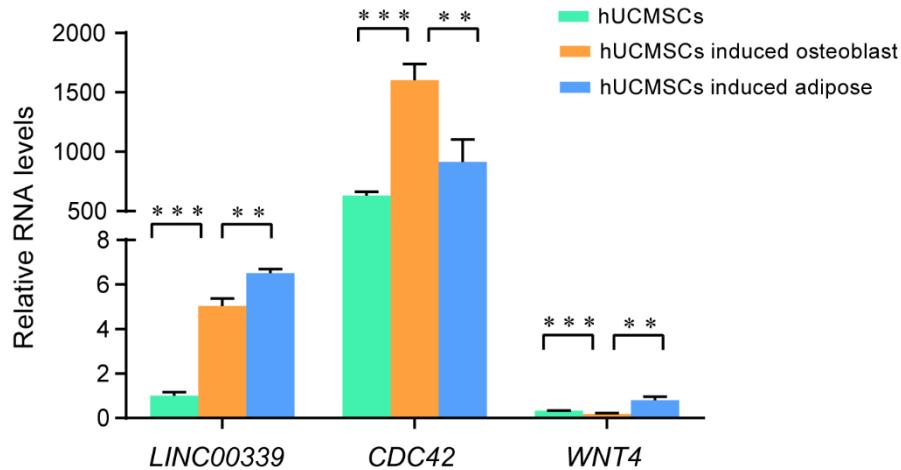

**Figure S8. Comparison of gene expression in osteoblast and adipocyte cells induced from the same human mesenchymal stem cells**

We obtained umbilical cords from donors with signed informed consent in local hospital and isolated human umbilical cord mesenchymal stem cells (hUCMSCs) as described previously.<sup>5</sup> The hUCMSCs cells were cultured with  $\alpha$ -MEM supplemented with 10% FBS, 1% penicillin-streptomycin, and 0.2% cytokine CK2, CK4, CK8, CK9, and maintained at 37°C, 5% CO<sub>2</sub>. The osteogenic and adipogenic differentiation was performed by using the OriCell™ hUCMSCs osteogenic differentiation medium kit (HUXUC-90021, Cyagen, China) and the OriCell™ hUCMSCs adipogenic differentiation medium kit (HUXUC-90031, Cyagen, China) according to the manufacturer's instruction, respectively. Cells were maintained in differentiation medium and the medium was changed every 3 days. Two weeks later, cells were harvested for RNA extraction and RT-qPCR. Relative mRNA expression levels were normalized by equalizing *LINC00339* expression levels in human umbilical cord mesenchymal stem cells (hUCMSCs) to 1. Error bars, s.d. \*\* $P < 0.01$ , \*\*\* $P < 0.001$  as determined by an unpaired, two-tailed Student's t-test.

## Supplemental Tables

**Table S1. Basic characteristics of the Chinese cohort for genetic association analysis**

| Traits                                | Chinese cohort (n=1300) |
|---------------------------------------|-------------------------|
| Male/Female                           | 600/700                 |
| Age (years)                           | 33.42 (11.32)           |
| Weight (kg)                           | 59.63 (10.41)           |
| Height (cm)                           | 163.94 (8.11)           |
| Lumbar spine BMD (g/cm <sup>2</sup> ) | 0.921 (0.131)           |
| Femoral neck BMD (g/cm <sup>2</sup> ) | 0.815 (0.131)           |

Note: data are shown as mean (standard deviation, SD).

**Table S2. Summary of Hi-C or ChIA-PET data used in this study**

| Dataset <sup>a</sup>       | Data type    | Cell <sup>b</sup>                 | Reference                           |
|----------------------------|--------------|-----------------------------------|-------------------------------------|
| 4DGenome                   | Hi-C         | IMR90                             | Jin, F. et al. <sup>6</sup>         |
| Cell2014                   | Hi-C         | GM12878                           | Rao, Suhas S.P. et al. <sup>7</sup> |
| ChIA-PET <sup>GEO</sup>    | ChIA-PET     | GM12878                           | Tang, Z. et al. <sup>8</sup>        |
| ChIA-PET <sup>ENCODE</sup> | ChIA-PET     | K562, NB4, HCT-116, HeLa-S3, MCF7 | Harrow, J. et al. <sup>9</sup>      |
| Cell2016                   | Capture Hi-C | 17 human primary blood cell types | Javierre, B.M. et al. <sup>10</sup> |
| Mm2015                     | DNase Hi-C   | H1-hESC                           | Ma, W. et al. <sup>11</sup>         |
| NG2015                     | Capture Hi-C | GM12878; CD34                     | Mifsud, B. et al. <sup>12</sup>     |
| TAD                        | --           | IMR90                             | Dixon, J.R. et al. <sup>13</sup>    |

Note: <sup>a</sup>Dataset, Hi-C or ChIA-PET data used; <sup>b</sup>Cell, Hi-C data on human healthy cells or ChIA-PET data on all cells were collected; ChIA-PET<sup>GEO</sup>, ChIA-PET data retrieved from GEO database (GEO: GSE72816); ChIA-PET<sup>ENCODE</sup>, ChIA-PET data retrieved from UCSC ENCODE download portal.

**Table S3. Integrating Hi-C and cis-expression quantitative trait locus (eQTL) analysis for 8 BMD SNPs at 1p36.12**

| SNP              | Target gene predicted from Hi-C | Distance(kb) <sup>a</sup> | Dataset (cell)                    | Locus1                        | Locus2                        | $P_{eQTL}$                              | $\eta^2$              |
|------------------|---------------------------------|---------------------------|-----------------------------------|-------------------------------|-------------------------------|-----------------------------------------|-----------------------|
| <b>rs6426749</b> | <b><i>LINC00339</i></b>         | <b>-359.4</b>             | <b>4DGenome; IMR90</b>            | <b>chr1:22341459-22371546</b> | <b>chr1:22704394-22711600</b> | <b><math>5.61 \times 10^{-5}</math></b> | <b>0.04</b>           |
| <b>rs6426749</b> | <b><i>LINC00339</i></b>         | <b>-359.4</b>             | <b>Nm2015; H1-hESC</b>            | <b>chr1:22351460-22356461</b> | <b>chr1:22704000-22711000</b> | <b><math>5.61 \times 10^{-5}</math></b> | <b>0.04</b>           |
| rs6426749        | <i>WNT4</i>                     | -242                      | 4DGenome; IMR90                   | chr1:22434529-22463352        | chr1:22704394-22711600        | 0.45                                    | $3.50 \times 10^{-3}$ |
| rs6426749        | <i>WNT4</i>                     | -242                      | NG2015; GM12878                   | chr1:22466747-22478213        | chr1:22705031-22711598        | 0.45                                    | $3.50 \times 10^{-3}$ |
| rs6426749        | <i>WNT4</i>                     | -242                      | 4DGenome; IMR90                   | chr1:22466749-22528553        | chr1:22704394-22711600        | 0.45                                    | $3.50 \times 10^{-3}$ |
| rs6426749        | <i>WNT4</i>                     | -242                      | 4DGenome; IMR90                   | chr1:22466749-22478215        | chr1:22703397-22711600        | 0.45                                    | $3.50 \times 10^{-3}$ |
| rs6426749        | <i>RPI-224A6.3</i>              | -360                      | 4DGenome; IMR90                   | chr1:22341459-22371546        | chr1:22704394-22711600        | 0.43                                    | $6.25 \times 10^{-3}$ |
| rs6426749        | <i>ZBTB40</i>                   | 67                        | 4DGenome; IMR90                   | chr1:22769969-22795701        | chr1:22704394-22711600        | 0.93                                    | $2.96 \times 10^{-4}$ |
| rs6426749        | <i>RPI-224A6.9</i>              | -284.4                    | 4DGenome; IMR90                   | chr1:22425025-22427905        | chr1:22703397-22721228        | NA                                      | NA                    |
| rs34920465       | <i>WNT4</i>                     | -229.9                    | NG2015; GM12878                   | chr1:22466747-22478213        | chr1:22697090-22702342        | 0.53                                    | $2.79 \times 10^{-3}$ |
| rs6696981        | <i>WNT4</i>                     | -232.4                    | 4DGenome; IMR90                   | chr1:22440795-22463352        | chr1:22702345-22704393        | 0.63                                    | $2.03 \times 10^{-3}$ |
| rs6696981        | <i>WNT4</i>                     | -232.4                    | NG2015; CD34                      | chr1:22466747-22478213        | chr1:22702343-22703394        | 0.63                                    | $2.03 \times 10^{-3}$ |
| rs7524102        | <i>WNT4</i>                     | -228.0                    | NG2015; GM12878                   | chr1:22466747-22478213        | chr1:22697090-22702342        | 0.57                                    | $2.45 \times 10^{-3}$ |
| rs2235529        | <i>HSPG2</i>                    | -186.7                    | ChIA-PET <sup>ENCODE</sup> ; MCF7 | chr1:22262651-22265288        | chr1:22448523-22450702        | 0.92                                    | $3.63 \times 10^{-4}$ |
| rs2235529        | <i>WNT4</i>                     | 20.0                      | ChIA-PET <sup>ENCODE</sup> ; K562 | chr1:22450461-22453077        | chr1:22468006-22470655        | 0.99                                    | $5.56 \times 10^{-5}$ |
| rs2235529        | <i>WNT4</i>                     | 20.0                      | ChIA-PET <sup>ENCODE</sup> ; MCF7 | chr1:22446379-22450951        | chr1:22454408-22458465        | 0.99                                    | $5.56 \times 10^{-5}$ |
| rs2235529        | <i>WNT4</i>                     | 20.0                      | ChIA-PET <sup>ENCODE</sup> ; K562 | chr1:22448838-22451961        | chr1:22466949-22469506        | 0.99                                    | $5.56 \times 10^{-5}$ |
| rs2235529        | <i>RPI-224A6.9</i>              | -2.4                      | 4DGenome; IMR90                   | chr1:22450003-22488812        | chr1:22425025-22427905        | NA                                      | NA                    |
| rs3765350        | <i>HSPG2</i>                    | -183.5                    | NG2015; GM12878                   | chr1:22263134-22276213        | chr1:22440793-22450000        | 0.88                                    | $5.50 \times 10^{-4}$ |
| rs3765350        | <i>WNT4</i>                     | 23.1                      | NG2015; GM12878                   | chr1:22466747-22478213        | chr1:22440793-22450000        | 0.62                                    | $2.06 \times 10^{-3}$ |
| rs3765350        | <i>WNT4</i>                     | 23.1                      | ChIA-PET <sup>ENCODE</sup> ; K562 | chr1:22446637-22449453        | chr1:22469771-22471584        | 0.62                                    | $2.06 \times 10^{-3}$ |
| rs3765350        | <i>WNT4</i>                     | 23.1                      | ChIA-PET <sup>ENCODE</sup> ; MCF7 | chr1:22446379-22450951        | chr1:22454408-22458465        | 0.62                                    | $2.06 \times 10^{-3}$ |
| rs3765350        | <i>WNT4</i>                     | 23.1                      | NG2015; CD34                      | chr1:22466747-22478213        | chr1:22440793-22450000        | 0.62                                    | $2.06 \times 10^{-3}$ |

Note: Hi-C, Capture Hi-C, DNase Hi-C and ChIA-PET data on over 20 cells summarized in Table S1 were used, with chromatin interaction regions showed in Locus1 and Locus2 (hg19); NA, not available; <sup>a</sup>Distance is the distance between SNP and transcription start site of target gene.

**Table S4. Cis-expression quantitative trait locus (eQTL) analysis results for rs6426749, rs6684375, and rs34963268**

| Gene                    | rs6426749     |                                         |                       | rs6684375     |                                         |                       | rs34963268    |                                         |                       |
|-------------------------|---------------|-----------------------------------------|-----------------------|---------------|-----------------------------------------|-----------------------|---------------|-----------------------------------------|-----------------------|
|                         | Distance      | P-value                                 | $\eta^2$              | Distance      | P-value                                 | $\eta^2$              | Distance      | P-value                                 | $\eta^2$              |
| <i>C1orf213</i>         | 984.3         | 0.62                                    | $2.07 \times 10^{-3}$ | 989.3         | 0.72                                    | $1.44 \times 10^{-3}$ | 984.9         | 0.72                                    | $1.44 \times 10^{-3}$ |
| <i>HNRNPR</i>           | 959.3         | 0.49                                    | $3.15 \times 10^{-3}$ | 964.4         | 0.73                                    | $1.35 \times 10^{-3}$ | 959.9         | 0.73                                    | $1.35 \times 10^{-3}$ |
| <i>RP5-1057J7.1</i>     | 859.8         | 0.33                                    | $4.81 \times 10^{-3}$ | 864.8         | 0.26                                    | $5.87 \times 10^{-3}$ | 860.4         | 0.26                                    | $5.87 \times 10^{-3}$ |
| <i>LUZP1</i>            | 724.2         | 0.52                                    | $2.84 \times 10^{-3}$ | 729.2         | 0.40                                    | $3.97 \times 10^{-3}$ | 724.7         | 0.40                                    | $3.97 \times 10^{-3}$ |
| <i>KDM1A</i>            | 634.5         | 0.29                                    | $5.36 \times 10^{-3}$ | 639.5         | 0.47                                    | $3.33 \times 10^{-3}$ | 635.1         | 0.47                                    | $3.33 \times 10^{-3}$ |
| <i>EPHB2</i>            | 326.0         | 0.53                                    | $2.72 \times 10^{-3}$ | 331.0         | 0.44                                    | $3.60 \times 10^{-3}$ | 326.6         | 0.44                                    | $3.60 \times 10^{-3}$ |
| <i>ZBTB40</i>           | 67.0          | 0.93                                    | $2.96 \times 10^{-4}$ | 72.0          | 0.86                                    | $6.59 \times 10^{-4}$ | 67.6          | 0.86                                    | $6.59 \times 10^{-4}$ |
| <i>WNT4</i>             | -242.0        | 0.45                                    | $3.50 \times 10^{-3}$ | -237.0        | 0.62                                    | $2.08 \times 10^{-3}$ | -241.4        | 0.62                                    | $2.08 \times 10^{-3}$ |
| <b><i>CDC42</i></b>     | <b>-332.4</b> | <b><math>4.56 \times 10^{-3}</math></b> | <b>0.023</b>          | <b>-327.3</b> | <b><math>5.70 \times 10^{-3}</math></b> | <b>0.022</b>          | <b>-331.8</b> | <b><math>5.70 \times 10^{-3}</math></b> | <b>0.022</b>          |
| <b><i>LINC00339</i></b> | <b>-359.4</b> | <b><math>5.61 \times 10^{-5}</math></b> | <b>0.042</b>          | <b>-354.4</b> | <b><math>4.25 \times 10^{-4}</math></b> | <b>0.033</b>          | <b>-358.9</b> | <b><math>4.25 \times 10^{-4}</math></b> | <b>0.033</b>          |
| <i>RP1-224A6.3</i>      | -360.0        | 0.43                                    | $6.25 \times 10^{-3}$ | -355.0        | 0.27                                    | $5.75 \times 10^{-3}$ | -359.4        | 0.27                                    | $5.75 \times 10^{-3}$ |
| <i>HSPG2</i>            | -447.7        | 0.26                                    | $5.84 \times 10^{-3}$ | -442.6        | 0.37                                    | $4.26 \times 10^{-3}$ | -447.1        | 0.37                                    | $4.26 \times 10^{-3}$ |
| <i>RP11-26H16.1</i>     | -476.9        | 0.24                                    | $3.64 \times 10^{-3}$ | -471.8        | 0.38                                    | $4.15 \times 10^{-3}$ | -476.3        | 0.38                                    | $4.15 \times 10^{-3}$ |
| <i>LDLRAD2</i>          | -572.7        | 0.40                                    | $4.02 \times 10^{-3}$ | -567.7        | 0.59                                    | $2.26 \times 10^{-3}$ | -572.1        | 0.59                                    | $2.26 \times 10^{-3}$ |
| <i>USP48</i>            | -658.4        | 0.91                                    | $4.15 \times 10^{-4}$ | -653.4        | 0.69                                    | $1.64 \times 10^{-3}$ | -657.8        | 0.69                                    | $1.64 \times 10^{-3}$ |
| <i>NBPF3</i>            | -944.9        | 0.27                                    | $5.65 \times 10^{-3}$ | -939.8        | 0.43                                    | $3.63 \times 10^{-3}$ | -944.3        | 0.43                                    | $3.63 \times 10^{-3}$ |
| <i>HS6ST1P1</i>         | -956.7        | 0.91                                    | $4.12 \times 10^{-4}$ | -951.6        | 0.85                                    | $7.26 \times 10^{-4}$ | -956.1        | 0.85                                    | $7.26 \times 10^{-4}$ |
| <i>NBPF2P</i>           | -957.0        | 0.81                                    | $9.39 \times 10^{-4}$ | -952.0        | 0.75                                    | $1.26 \times 10^{-3}$ | -956.4        | 0.75                                    | $1.26 \times 10^{-3}$ |
| <i>PPP1R11P1</i>        | -987.0        | 0.39                                    | $4.04 \times 10^{-3}$ | -982.0        | 0.41                                    | $3.87 \times 10^{-3}$ | -986.4        | 0.41                                    | $3.87 \times 10^{-3}$ |

Note: Distance is the distance between SNP and transcription start site of target gene (kb).

**Table S5. Co-expression analysis between *LINC00339* and *CDC42***

| Tissues                                 | Samples <sup>a</sup> | <i>CDC42</i><br>expression | <i>LINC00339</i><br>expression | P-value  | R <sup>2b</sup> |
|-----------------------------------------|----------------------|----------------------------|--------------------------------|----------|-----------------|
| Thyroid                                 | 355                  | 42.34(6.88)                | 12.22(3.55)                    | 6.15E-15 | -0.398          |
| Vagina                                  | 97                   | 53.61(9.50)                | 6.96(2.88)                     | 2.66E-04 | -0.362          |
| Ovary                                   | 108                  | 42.90(6.86)                | 10.08(2.81)                    | 2.72E-04 | -0.344          |
| Colon transverse                        | 204                  | 53.93(9.69)                | 6.61(2.43)                     | 2.14E-05 | -0.293          |
| Stomach                                 | 204                  | 43.82(9.21)                | 6.71(2.45)                     | 1.36E-03 | -0.223          |
| Spleen                                  | 118                  | 55.72(8.46)                | 14.49(3.58)                    | 2.23E-02 | -0.21           |
| Small intestine terminal ileum          | 104                  | 53.27(7.22)                | 7.90(3.32)                     | 3.78E-02 | -0.204          |
| Prostate                                | 119                  | 40.57(6.24)                | 9.60(3.36)                     | 4.37E-02 | -0.185          |
| Liver                                   | 137                  | 23.75(7.51)                | 5.44(2.19)                     | 3.24E-02 | -0.183          |
| Colon sigmoid                           | 173                  | 45.29(6.50)                | 7.32(3.03)                     | 2.40E-02 | -0.172          |
| Esophagus mucosa                        | 331                  | 55.43(7.16)                | 4.22(1.87)                     | 6.68E-03 | -0.149          |
| Nerve tibial                            | 335                  | 46.76(6.78)                | 9.98(2.68)                     | 4.91E-02 | -0.108          |
| Brain cortex                            | 128                  | 28.58(5.81)                | 4.39(1.32)                     | 7.47E-03 | 0.235           |
| Brain cerebellar hemisphere             | 115                  | 40.26(9.50)                | 6.09(1.86)                     | 2.65E-03 | 0.278           |
| Brain spinal cord (cervical c-1)        | 76                   | 45.03(13.42)               | 4.00(1.13)                     | 6.25E-04 | 0.384           |
| Brain nucleus accumbens (basal ganglia) | 123                  | 24.74(8.58)                | 3.81(1.39)                     | 1.03E-07 | 0.458           |
| Brain caudate (basal ganglia)           | 134                  | 25.62(8.06)                | 3.77(1.32)                     | 5.64E-09 | 0.477           |
| Brain putamen (basal ganglia)           | 103                  | 23.44(6.98)                | 3.71(1.50)                     | 3.21E-08 | 0.512           |
| Brain frontal cortex (BA9)              | 117                  | 37.36(10.21)               | 4.43(1.68)                     | 1.67E-09 | 0.521           |
| Brain anterior cingulate cortex (BA24)  | 99                   | 34.32(11.84)               | 3.65(1.38)                     | 2.10E-10 | 0.585           |
| Brain hippocampus                       | 103                  | 30.66(10.36)               | 3.77(1.17)                     | 3.69E-12 | 0.618           |
| Brain substantia nigra                  | 71                   | 34.63(11.66)               | 3.96(1.37)                     | 2.75E-10 | 0.664           |
| Brain amygdala                          | 81                   | 27.83(9.94)                | 3.26(1.25)                     | 4.44E-16 | 0.754           |

|                      |     |              |            |                |       |
|----------------------|-----|--------------|------------|----------------|-------|
| Brain hypothalamus   | 104 | 42.04(14.33) | 4.72(1.69) | $P < 2.20E-12$ | 0.759 |
| Whole blood          | 445 | 83.71(37.45) | 4.10(2.24) | $P < 2.20E-12$ | 0.586 |
| Testis               | 199 | 29.88(8.00)  | 9.68(1.67) | 7.93E-12       | 0.46  |
| Adrenal gland        | 159 | 44.93(6.44)  | 7.55(2.23) | 2.63E-02       | 0.176 |
| Muscle skeletal      | 469 | 20.52(6.10)  | 3.91(2.47) | 8.37E-10       | 0.279 |
| Heart left ventricle | 267 | 25.92(9.09)  | 3.98(2.17) | 3.77E-05       | 0.249 |

Note: Co-expression analysis was conducted by Pearson correlation using GTEx RNA expression data<sup>1</sup> in 50 tissues (4 tissues with sample counts less than 20 were excluded). Only significantly correlated tissues ( $P < 0.05$ ) were showed. Expression data was shown as mean (standard deviation, SD); <sup>a</sup>Samples were sample counts without missing *CDC42* or *LINC00339* expression data; <sup>b</sup> $R^2$  was Pearson Correlation Coefficient.



**Table S6. Chromatin interactions between *LINC00339* and *CDC42***

| Cell    | Validation                 | Locus1                 | Gene1            | Locus2                 | Gene2        | Score    |
|---------|----------------------------|------------------------|------------------|------------------------|--------------|----------|
| K562    | ChIA-PET <sup>ENCODE</sup> | chr1:22348117-22354021 | <i>LINC00339</i> | chr1:22376823-22382698 | <i>CDC42</i> | 15       |
| K562    | ChIA-PET <sup>ENCODE</sup> | chr1:22348152-22354988 | <i>LINC00339</i> | chr1:22377027-22382698 | <i>CDC42</i> | 18       |
| MCF7    | ChIA-PET <sup>ENCODE</sup> | chr1:22350975-22355164 | <i>LINC00339</i> | chr1:22378266-22380971 | <i>CDC42</i> | 7        |
| MCF7    | ChIA-PET <sup>ENCODE</sup> | chr1:22351119-22355075 | <i>LINC00339</i> | chr1:22377954-22381978 | <i>CDC42</i> | 5        |
| HeLa-S3 | ChIA-PET <sup>ENCODE</sup> | chr1:22351928-22352455 | <i>LINC00339</i> | chr1:22379030-22380021 | <i>CDC42</i> | 3        |
| K562    | ChIA-PET <sup>ENCODE</sup> | chr1:22354998-22357992 | <i>LINC00339</i> | chr1:22377814-22380762 | <i>CDC42</i> | 2        |
| GM12878 | ChIA-PET <sup>GEO</sup>    | chr1:22349358-22349912 | <i>LINC00339</i> | chr1:22379575-22381183 | <i>CDC42</i> | 5        |
| GM12878 | ChIA-PET <sup>GEO</sup>    | chr1:22350646-22354253 | <i>LINC00339</i> | chr1:22377722-22381071 | <i>CDC42</i> | 61       |
| H1-hESC | Nm2015                     | chr1:22351460-22356461 | <i>LINC00339</i> | chr1:22374000-22388000 | <i>CDC42</i> | NA       |
| IMR90   | 4DGenome                   | chr1:22341459-22375876 | <i>LINC00339</i> | chr1:22375877-22377917 | <i>CDC42</i> | 4.17E-06 |
| IMR90   | 4DGenome                   | chr1:22351108-22359290 | <i>LINC00339</i> | chr1:22379987-22393227 | <i>CDC42</i> | 5.70E-04 |
| IMR90   | 4DGenome                   | chr1:22351108-22376206 | <i>LINC00339</i> | chr1:22377918-22379986 | <i>CDC42</i> | 3.52E-12 |
| IMR90   | 4DGenome                   | chr1:22359539-22409777 | <i>LINC00339</i> | chr1:22351108-22359290 | <i>CDC42</i> | 3.47E-14 |

Note: Hi-C, DNase Hi-C and ChIA-PET data summarized in Table S1 were used, with chromatin interaction regions showed in Locus1 and Locus2 (hg19); NA, not available; <sup>a</sup>Score: Confidence *P*-value for Hi-C or confidence scores for ChIA-PET chromatin interactions.

**Table S7. Summary of primers or siRNA sequences used**

| Assays                         | Target                  | Primers (5'-3')                                   |
|--------------------------------|-------------------------|---------------------------------------------------|
| Luciferase Report-Fusion PCR   | rs6426749-F1            | <u>GGGGTACCTTTT</u> AGGGAGTTTGAATTGGGCTC (Kpn I)  |
|                                | rs6426749-R1            | AGGCCAGAGGACTATTGTATTTGA                          |
|                                | <i>LINC00339</i> -F1    | AATAGTCCTCTGGCCTTGGTTAGCATCTCTGCTTCCTCTA          |
|                                | <i>LINC00339</i> -R1    | <u>CGACGCGT</u> TGGACGAGGAAAGATCAGGATAAGA (Mlu I) |
| Luciferase Report PCR          | rs34963268-F1           | <u>GGGGTACCAGGCATCTGATAA</u> AGACTCCG (Kpn I)     |
|                                | rs34963268-R1           | <u>CGACGCGT</u> TAAAAGGCCCCAGTAACCC (Mlu I)       |
|                                | rs6684375-F1            | <u>GGGGTACCCCTCATGCCAATGACTCTGGT</u> (Kpn I)      |
|                                | rs6684375-R1            | <u>CGACGCGTATAGCCTGTCCTCATCCTTCCG</u> (Mlu I)     |
|                                | <i>LINC00339</i> -F2    | <u>CGACGCGT</u> TGGTTAGCATCTCTGCTTCCTCTA (Mlu I)  |
|                                | <i>LINC00339</i> -R2    | <u>GAAGATCTGGACGAGGAAAGATCAGGATAAGA</u> (Bgl II)  |
| Luciferase Report-Promoter PCR | <i>LINC00339</i> -F     | <u>GGGGTACCTGGTTAGCATCTCTGCTTCCTCTA</u> (Kpn I)   |
|                                | <i>LINC00339</i> -R     | <u>CGACGCGTGGACGAGGAAAGATCAGGATAAGA</u> (Mlu I)   |
| Site-directed mutagenesis      | rs6426749-F (G-C)       | CATACTGGCTGCTGAGCTCCAGGCCAATGGAC                  |
|                                | rs6426749-R (G-C)       | GTCCATTGGCCTGGAGCTCAGCAGCCAGTATG                  |
|                                | rs34963268-F (C-G)      | CTGGATCGTTGACGTCATTTGAGTGCCTGGAT                  |
|                                | rs34963268-R (C-G)      | TGACGTCAACGATCCAGGCACTCAAATGACGT                  |
|                                | rs6684375-F (C-T)       | TGGGAATCTGCTCCTCTTCTCTTTTGGGTTGG                  |
|                                | rs6684375-R (C-T)       | AGAGGAGCAGATTCCCAGGGGCCCTCCGGCTAAGC               |
| siRNAs (sense)                 | <i>CTCF</i>             | UCACCCUCCUGAGGAAUCACCUUAA                         |
|                                | <i>TFAP2A</i> (siRNA-1) | CCGUCUCCGCCAUCCCUAUUAACAA                         |
|                                | <i>TFAP2A</i> (siRNA-2) | AACAUCCCAGAUCAAACUGUA                             |
| CRISPR/Cas9                    | sgRNA 1-F               | ACCGTCCTTTCTTCTTTGGACAC                           |
|                                | sgRNA 1-R               | AAACGTGTCCAAAGAAGAAAGGA                           |
|                                | sgRNA 2-F               | ACCGGCCGCACATTGACATCACC                           |

|            |                     |                           |
|------------|---------------------|---------------------------|
| dCas9-KRAB | sgRNA 2-R           | AAACGGTGATGTCAATGTGCGGC   |
|            | sgRNA-1-F           | ACCGGGGAGCCCTTCCATTCTCG   |
|            | sgRNA-1-R           | AAACCGAGAATGGAAGGGCTCCC   |
|            | sgRNA-2-F           | ACCGGCTGATATTAGCAGTGTAC   |
|            | sgRNA-2-R           | AAACGTACTACTGCTAATATCAGC  |
|            | sgRNA-3-F           | ACCGCCAATGGGGCATGAGTTG    |
| RT-qPCR    | sgRNA-3-R           | AAACCAACTCATGCCCCATTGGC   |
|            | <i>LINC00339</i> -F | GTCCAGATTCCACGAGAGCCTT    |
|            | <i>LINC00339</i> -R | GTCTCAGCCACCACCGTCCA      |
|            | <i>CDC42</i> -F     | GATGGTGCTGTTGGTAAA        |
|            | <i>CDC42</i> -R     | TAACTCAGCGGTCGTAAT        |
|            | <i>CTCF</i> -F      | GTGTTCCATGTGCGATTACG      |
|            | <i>CTCF</i> -R      | TCATGTGCCTTTTCAGCTTG      |
|            | <i>TFAP2A</i> -F    | GTTCACGCCGATCCATGAAAA     |
| ChIP-qPCR  | <i>TFAP2A</i> -R    | AGATTGACCTACAGTGCCCAG     |
|            | rs6426749-F         | ATGTGAAATGCTTACACTGGAGTTC |
|            | rs6426749-R         | ATGTGAAATGCTTACACTGGAGTTC |

Note: F, forward primer; R, reverse primer; Restriction enzyme site sequences were underlined; For rs6426749, we used fusion PCR<sup>14</sup> to effectively get the long fragment containing both enhancer and *LINC00339* promoter, which was further inserted into the pGL3-basic vector. For rs34963268 and rs6684375, we appended the same restriction enzyme sites to both enhancer and *LINC00339* promoter, which were further inserted into the pGL3-basic vector sequentially.

**Table S8. Genetic association with *LINC00339* and BMD for 44 selected SNPs used for multi-instrument based Mendelian randomization analysis**

| SNP         | Chr | Position | eQTL <sup>a</sup>       |        | GWAS <sup>b</sup>       |        |
|-------------|-----|----------|-------------------------|--------|-------------------------|--------|
|             |     |          | <i>P</i>                | Beta   | <i>P</i>                | Beta   |
| rs471359    | 1   | 21656500 | 0.010                   | -0.248 | 0.006                   | 0.012  |
| rs78885464  | 1   | 21807864 | 0.001                   | -0.240 | 0.440                   | 0.003  |
| rs61778393  | 1   | 21902436 | 0.006                   | 0.512  | 0.003                   | 0.030  |
| rs1130564   | 1   | 21952884 | 0.005                   | -0.366 | 0.380                   | 0.009  |
| rs12128206  | 1   | 21980091 | 4.231×10 <sup>-4</sup>  | 0.631  | 0.036                   | 0.020  |
| rs60765766  | 1   | 22017013 | 0.010                   | 0.258  | 0.043                   | -0.012 |
| rs2315928   | 1   | 22189447 | 0.009                   | -0.527 | 0.680                   | -0.027 |
| rs114537356 | 1   | 22214279 | 0.003                   | 0.739  | 0.240                   | -0.014 |
| rs114568494 | 1   | 22241660 | 0.004                   | -0.650 | 0.009                   | 0.032  |
| rs6684979   | 1   | 22261395 | 0.008                   | -0.406 | 0.240                   | -0.011 |
| rs35601247  | 1   | 22272915 | 0.004                   | 0.540  | 0.350                   | -0.015 |
| rs145444626 | 1   | 22287577 | 2.310×10 <sup>-4</sup>  | 0.913  | 0.680                   | 0.000  |
| rs6661287   | 1   | 22298481 | 0.005                   | 0.265  | 0.740                   | -0.001 |
| rs12059804  | 1   | 22304585 | 0.002                   | 0.185  | 0.500                   | 0.003  |
| rs61777960  | 1   | 22311348 | 0.002                   | -0.184 | 3.100×10 <sup>-4</sup>  | -0.013 |
| rs10917101  | 1   | 22314475 | 1.416×10 <sup>-4</sup>  | -0.262 | 0.036                   | 0.010  |
| rs2865210   | 1   | 22342050 | 0.002                   | -0.203 | 0.960                   | -0.001 |
| rs2255282   | 1   | 22352040 | 1.012×10 <sup>-20</sup> | -0.473 | 0.011                   | -0.008 |
| rs116674939 | 1   | 22354237 | 2.753×10 <sup>-7</sup>  | 0.853  | 0.044                   | 0.023  |
| rs150153349 | 1   | 22355890 | 0.005                   | -0.449 | 0.330                   | -0.012 |
| rs2473277   | 1   | 22361845 | 1.618×10 <sup>-18</sup> | -0.447 | 0.012                   | -0.008 |
| rs2473317   | 1   | 22395251 | 8.522×10 <sup>-4</sup>  | -0.252 | 0.490                   | 0.004  |
| rs16826588  | 1   | 22424113 | 2.482×10 <sup>-4</sup>  | 0.445  | 0.074                   | 0.020  |
| rs1046310   | 1   | 22443887 | 2.005×10 <sup>-10</sup> | -0.317 | 8.900×10 <sup>-4</sup>  | -0.010 |
| rs10917161  | 1   | 22460208 | 0.006                   | -0.454 | 0.004                   | 0.025  |
| rs113155445 | 1   | 22472435 | 9.761×10 <sup>-4</sup>  | -0.262 | 0.330                   | 0.005  |
| rs4655026   | 1   | 22473658 | 2.811×10 <sup>-8</sup>  | -0.288 | 2.100×10 <sup>-4</sup>  | -0.011 |
| rs735475    | 1   | 22482230 | 0.004                   | 0.470  | 0.680                   | 0.006  |
| rs2807352   | 1   | 22495261 | 3.293×10 <sup>-5</sup>  | 0.223  | 6.700×10 <sup>-5</sup>  | 0.013  |
| rs2982286   | 1   | 22506729 | 0.003                   | -0.151 | 5.300×10 <sup>-15</sup> | -0.027 |
| rs140767127 | 1   | 22512667 | 0.008                   | -0.628 | 0.170                   | -0.026 |
| rs115963111 | 1   | 22534928 | 0.001                   | 0.636  | 0.830                   | 0.002  |
| rs2807331   | 1   | 22565967 | 1.798×10 <sup>-4</sup>  | 0.198  | 2.900×10 <sup>-5</sup>  | 0.014  |
| rs75868741  | 1   | 22594676 | 0.008                   | 0.237  | 3.300×10 <sup>-8</sup>  | -0.027 |
| rs1007243   | 1   | 22614839 | 0.006                   | 0.166  | 0.001                   | 0.013  |
| rs74816778  | 1   | 22641134 | 0.008                   | 0.451  | 0.009                   | -0.025 |
| rs11585537  | 1   | 22656868 | 0.004                   | -0.222 | 0.250                   | -0.005 |
| rs61769163  | 1   | 22678805 | 7.692×10 <sup>-4</sup>  | 0.388  | 0.057                   | 0.013  |
| rs4654807   | 1   | 22949552 | 0.009                   | -0.216 | 0.730                   | 0.001  |
| rs7549888   | 1   | 23004019 | 0.004                   | 0.153  | 0.250                   | -0.003 |

---

|             |   |          |       |        |       |        |
|-------------|---|----------|-------|--------|-------|--------|
| rs11811882  | 1 | 23019404 | 0.006 | 0.158  | 0.570 | -0.002 |
| rs75858988  | 1 | 23035195 | 0.006 | -0.488 | 0.011 | -0.033 |
| rs111727123 | 1 | 23063461 | 0.007 | -0.576 | 0.300 | -0.023 |
| rs76603191  | 1 | 23133152 | 0.003 | 0.502  | 0.055 | 0.012  |

---

Note: eQTL<sup>a</sup>: Genetic association with *LINC00339* expression extracted from GTEx whole blood tissue;<sup>1</sup> GWAS<sup>b</sup>: Genetic association with BMD collected from UK Biobank.<sup>4</sup>

## Supplemental References

1. Lonsdale, J., Thomas, J., Salvatore, M., Phillips, R., Lo, E., Shad, S., Hasz, R., Walters, G., Garcia, F., Young, N., et al. (2013). The Genotype-Tissue Expression (GTEx) project. *Nat Genet* 45, 580-585.
2. Thompson, B., Varticovski, L., Baek, S., and Hager, G.L. (2016). Genome-Wide Chromatin Landscape Transitions Identify Novel Pathways in Early Commitment to Osteoblast Differentiation. *PLOS ONE* 11, e0148619.
3. Hon, C.C., Ramilowski, J.A., Harshbarger, J., Bertin, N., Rackham, O.J., Gough, J., Denisenko, E., Schmeier, S., Poulsen, T.M., Severin, J., et al. (2017). An atlas of human long non-coding RNAs with accurate 5' ends. *Nature* 543, 199-204.
4. Kemp, J.P., Morris, J.A., Medina-Gomez, C., Forgetta, V., Warrington, N.M., Youtlen, S.E., Zheng, J., Gregson, C.L., Grundberg, E., Trajanoska, K., et al. (2017). Identification of 153 new loci associated with heel bone mineral density and functional involvement of GPC6 in osteoporosis. *Nat Genet*.
5. Lu, L.L., Liu, Y.J., Yang, S.G., Zhao, Q.J., Wang, X., Gong, W., Han, Z.B., Xu, Z.S., Lu, Y.X., Liu, D., et al. (2006). Isolation and characterization of human umbilical cord mesenchymal stem cells with hematopoiesis-supportive function and other potentials. *Haematologica* 91, 1017-1026.
6. Jin, F., Li, Y., Dixon, J.R., Selvaraj, S., Ye, Z., Lee, A.Y., Yen, C.-A., Schmitt, A.D., Espinoza, C.A., and Ren, B. (2013). A high-resolution map of the three-dimensional chromatin interactome in human cells. *Nature* 503, 290-294.
7. Rao, Suhas S.P., Huntley, Miriam H., Durand, Neva C., Stamenova, Elena K., Bochkov, Ivan D., Robinson, James T., Sanborn, Adrian L., Machol, I., Omer, Arina D., Lander, Eric S., et al. (2014). A 3D Map of the Human Genome at Kilobase Resolution Reveals Principles of Chromatin Looping. *Cell* 159, 1665-1680.
8. Tang, Z., Luo, O.J., Li, X., Zheng, M., Zhu, J.J., Szalaj, P., Trzaskoma, P., Magalska, A., Włodarczyk, J., Ruzszczycki, B., et al. (2015). CTCF-Mediated Human 3D Genome Architecture Reveals Chromatin Topology for Transcription. *Cell* 163, 1611-1627.
9. Harrow, J., Frankish, A., Gonzalez, J.M., Tapanari, E., Diekhans, M., Kokocinski, F., Aken, B.L., Barrell, D., Zadissa, A., Searle, S., et al. (2012). GENCODE: the reference human genome annotation for The ENCODE Project. *Genome Res* 22, 1760-1774.
10. Javierre, B.M., Burren, O.S., Wilder, S.P., Kreuzhuber, R., Hill, S.M., Sewitz, S., Cairns, J., Wingett, S.W., Várnai, C., Thiecke, M.J., et al. (2016). Lineage-Specific Genome Architecture Links Enhancers and Non-coding Disease Variants to Target Gene Promoters. *Cell* 167, 1369-1384.e1319.
11. Ma, W., Ay, F., Lee, C., Gulsoy, G., Deng, X., Cook, S., Hesson, J., Cavanaugh, C., Ware, C.B., Krumm, A., et al. (2015). Fine-scale chromatin interaction maps reveal the cis-regulatory landscape of human lincRNA genes. *Nat Meth* 12, 71-78.
12. Mifsud, B., Tavares-Cadete, F., Young, A.N., Sugar, R., Schoenfelder, S., Ferreira, L., Wingett, S.W., Andrews, S., Grey, W., Ewels, P.A., et al. (2015). Mapping long-range promoter contacts in human cells with high-resolution capture Hi-C. *Nat Genet* 47, 598-606.
13. Dixon, J.R., Selvaraj, S., Yue, F., Kim, A., Li, Y., Shen, Y., Hu, M., Liu, J.S., and Ren, B. (2012). Topological domains in mammalian genomes identified by analysis of chromatin interactions. *Nature* 485, 376-380.
14. Horton, R.M., Hunt, H.D., Ho, S.N., Pullen, J.K., and Pease, L.R. (1989). Engineering hybrid genes

without the use of restriction enzymes: gene splicing by overlap extension. *Gene* 77, 61-68.
